# Supplementary material for: Alpha-Synuclein Preserves Mitochondrial Fusion and Function in Neuronal Cells
Source: Hindawi journal article supplement (doi:10.1155/2019/4246350), 2019-11-23

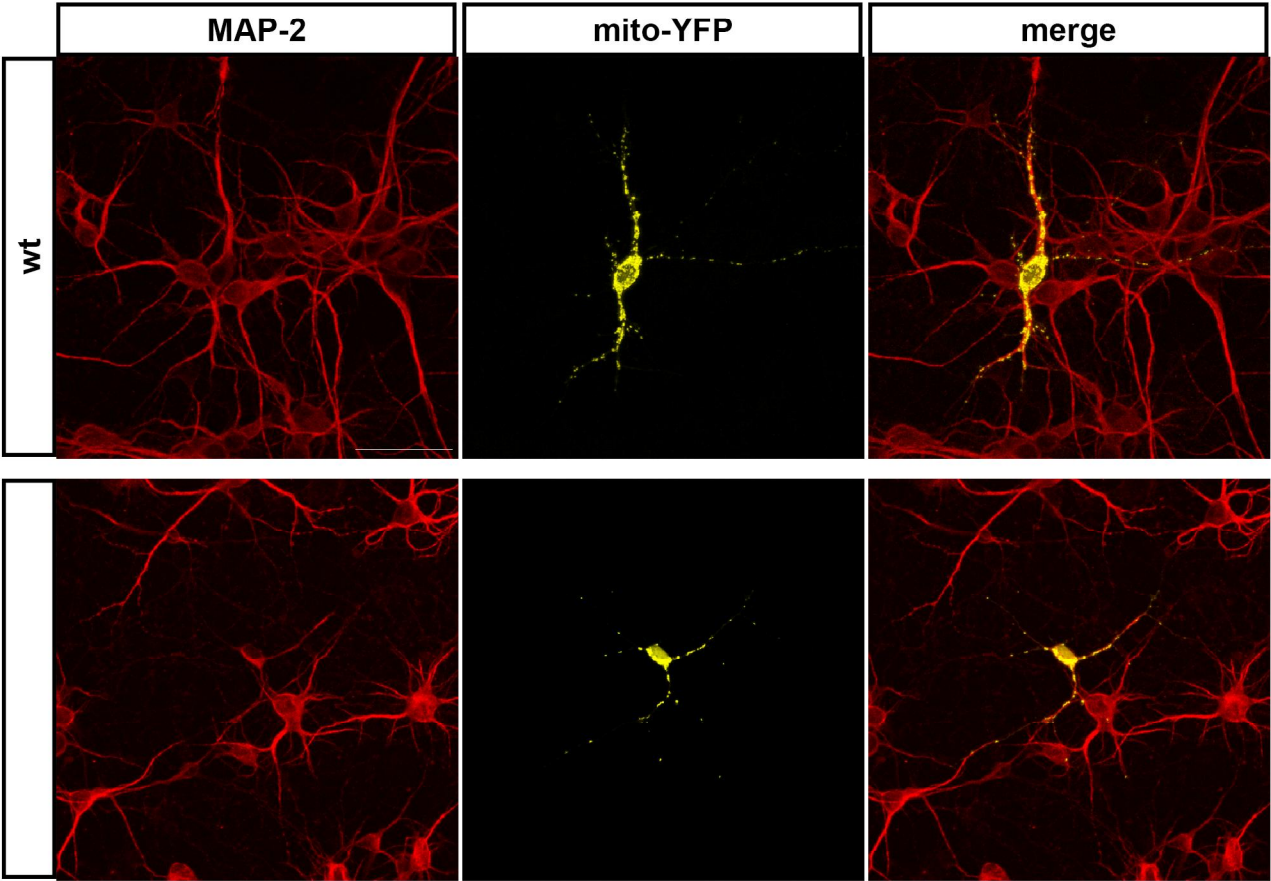

Supplement: f1 [file 4246350.f1.pdf]
